# Supplementary material for: Chidamide Reverses Fluzoparib Resistance in Triple-Negative Breast Cancer Cells
Source: Frontiers journal article supplement (doi:10.3389/fonc.2022.819714), 2022-02-18
Supplement: Data_Sheet_1.ZIP [file Data_Sheet_1.ZIP]

## Sheet: Sheet1
	PBS				Fluzoparib BID×21				Chidamide BW×3				Fluzoparib BID×21+Chidamide BW×3
0	20.18	20.37	20.15		20.81	20.7	20.1		19.85	20.56	20.65		20.25	20.45	20.48
3	20.34	20.12	20.14		20.86	20.81	20.22		19.75	20.72	20.85		20.55	20.93	20.85
6	19.73	19.81	20.27		20.78	20.83	20.25		19.92	20.82	20.87		20.68	20.96	20.39
9	19.61	19.24	20.05		21.05	21.18	20.87		20.25	20.54	20.7		20.5	21.22	21.45
12	19.28	18.26	19.4		21.18	21.24	21.02		20.51	20.14	20.25		20.95	21.75	21.83
15	18.86	18.2	19.01		21.26	21.32	21.35		20.38	20.1	20.17		21.15	22.21	22.15
18	18.63	17.75	18.45		21.57	21.56	21.59		20.14	20.08	20		21.64	22.57	22.35
21	17.75	17.23	18.26		21.61	21.68	21.63		20.08	20	19.89		21.85	22.56	22.85
