# Supplementary material for: Chidamide Reverses Fluzoparib Resistance in Triple-Negative Breast Cancer Cells
Source: Frontiers journal article supplement (doi:10.3389/fonc.2022.819714), 2022-02-18
Supplement: Data_Sheet_2.ZIP [file Data_Sheet_2.ZIP]

## Sheet: Sheet1
	NC HCC1937-FR					Si-MRE11 HCC1937-FR
0.390625	94.1347	93.1876	85.1677	92.065		84.8046	87.3054	90.9611	85.1197
0.78125	90.6017	95.6572	83.6465	87.0932		88.983	82.1979	88.6671	85.0681
1.5625	96.4611	84.0397	88.4608	84.3647		83.9972	89.6485	85.4782	78.9344
3.125	80.3605	88.0572	76.698	82.1403		79.5407	76.6971	75.9402	68.0597
6.25	84.6381	72.3057	73.1057	75.9731		76.9741	71.1878	72.5472	63.1065
12.5	69.9173	79.3971	70.9549	69.9981		70.6497	61.9105	67.6638	62.0238
25	59.0558	69.4641	63.1106	60.3717		60.1131	70.9246	55.6361	53.6572
50	52.0036	58.0697	56.9803	50.0814		46.924	40.9887	48.9863	55.6784
100	6.08494	7.66489	3.02187	2.15644		9.16467	8.69117	5.66718	9.65145
200	2.03194	6.06641	1.03645	3.13408		3.16798	4.01604	3.50971	1.03594
