# Supplementary material for: Chidamide Reverses Fluzoparib Resistance in Triple-Negative Breast Cancer Cells
Source: Front Oncol. 2022 Feb 18;12:819714. doi: 10.3389/fonc.2022.819714 (PMC8894594; doi:10.3389/fonc.2022.819714)
Supplement: Supplementary file 3 [file Table_1.xlsx]

## Sheet: Sheet1
DNA	DNA	double-strand break repair via nonhomologous end joining	6	RIF1,POLQ,UBE2N,MRE11A,POLA1,UBE2V2
DNA	DNA	DNA double-strand break processing	4	BRIP1,UBE2N,MRE11A,UBE2V2
DNA	DNA	DNA synthesis involved in DNA repair	6	TRIM25,DTL,POLA1,ISG15,RFC4,CDKN2D
DNA	DNA	regulation of double-strand break repair	7	RAD51AP1,RIF1,POLQ,ANKRD32,FOXM1,RAD51,DEK
DNA	DNA	regulation of DNA repair	9	RAD51AP1,RIF1,POLQ,ANKRD32,UBE2N,FOXM1,RAD51,DEK,UBE2V2
DNA	DNA	regulation of response to DNA damage stimulus	15	RAD51AP1,RIF1,WDR76,POLQ,ANKRD32,ETAA1,ATAD5,UBE2N,FOXM1,RAD51,CDKN2D,ANKLE1,DEK,UBE2V2,DDIAS
DNA	DNA	double-strand break repair via homologous recombination	11	RAD51AP1,POLQ,MMS22L,UBE2N,MRE11A,XRCC2,RAD54L,MCM8,RAD51,CDC7,RECQL
DNA	DNA	double-strand break repair	16	RAD51AP1,RIF1,BRIP1,POLQ,MMS22L,ESCO2,UBE2N,MRE11A,XRCC2,RAD54L,MCM8,POLA1,RAD51,CDC7,RECQL,UBE2V2
DNA	DNA	cellular response to DNA damage stimulus	34	RAD51AP1,RIF1,BRIP1,WDR76,POLQ,NEIL3,ANKRD32,PMS2,ETAA1,MMS22L,ESCO2,ATAD5,UBE2N,TRIM25,MRE11A,SPDYA,PIDD1,FOXM1,XRCC2,DTL,RAD54L,MSH5,MCM8,POLA1,ISG15,RAD51,RFC4,CDKN2D,ANKLE1,FANCB,CDC7,RECQL,MCM10,UBE2V2
DNA	DNA	DNA repair	29	RAD51AP1,RIF1,BRIP1,POLQ,NEIL3,ANKRD32,PMS2,ETAA1,MMS22L,ESCO2,UBE2N,TRIM25,MRE11A,FOXM1,XRCC2,DTL,RAD54L,MSH5,MCM8,POLA1,ISG15,RAD51,RFC4,CDKN2D,ANKLE1,FANCB,CDC7,RECQL,UBE2V2
			137

## Sheet: Sheet2
RIF1	POLQ	UBE2N	MRE11A	POLA1	UBE2V2
BRIP1	UBE2N	MRE11A	UBE2V2
TRIM25	DTL	POLA1	ISG15	RFC4	CDKN2D
RAD51AP1	RIF1	POLQ	ANKRD32	FOXM1	RAD51	DEK
RAD51AP1	RIF1	POLQ	ANKRD32	UBE2N	FOXM1	RAD51	DEK	UBE2V2
RAD51AP1	RIF1	WDR76	POLQ	ANKRD32	ETAA1	ATAD5	UBE2N	FOXM1	RAD51	CDKN2D	ANKLE1	DEK	UBE2V2	DDIAS
RAD51AP1	POLQ	MMS22L	UBE2N	MRE11A	XRCC2	RAD54L	MCM8	RAD51	CDC7	RECQL
RAD51AP1	RIF1	BRIP1	POLQ	MMS22L	ESCO2	UBE2N	MRE11A	XRCC2	RAD54L	MCM8	POLA1	RAD51	CDC7	RECQL	UBE2V2
RAD51AP1	RIF1	BRIP1	WDR76	POLQ	NEIL3	ANKRD32	PMS2	ETAA1	MMS22L	ESCO2	ATAD5	UBE2N	TRIM25	MRE11A	SPDYA	PIDD1	FOXM1	XRCC2	DTL	RAD54L	MSH5	MCM8	POLA1	ISG15	RAD51	RFC4	CDKN2D	ANKLE1	FANCB	CDC7	RECQL	MCM10	UBE2V2
RAD51AP1	RIF1	BRIP1	POLQ	NEIL3	ANKRD32	PMS2	ETAA1	MMS22L	ESCO2	UBE2N	TRIM25	MRE11A	FOXM1	XRCC2	DTL	RAD54L	MSH5	MCM8	POLA1	ISG15	RAD51	RFC4	CDKN2D	ANKLE1	FANCB	CDC7	RECQL	UBE2V2

## Sheet: 去重
RIF1
POLQ
UBE2N
MRE11A
POLA1
UBE2V2
RAD51AP1
RIF1
BRIP1
NEIL3
ANKRD32
PMS2
ETAA1
MMS22L
ESCO2
TRIM25
FOXM1
XRCC2
DTL
RAD54L
MSH5
MCM8
ISG15
RAD51
RFC4
CDKN2D
ANKLE1
FANCB
CDC7
RECQL
WDR76
ATAD5
SPDYA
PIDD1
MCM10
DEK
DDIAS

## Sheet: Sheet3
RAD51AP1
RIF1
BRIP1
WDR76
POLQ
NEIL3
ANKRD32
PMS2
ETAA1
MMS22L
ESCO2
ATAD5
UBE2N
TRIM25
MRE11A
SPDYA
PIDD1
FOXM1
XRCC2
DTL
RAD54L
MSH5
MCM8
POLA1
ISG15
RAD51
RFC4
CDKN2D
ANKLE1
FANCB
CDC7
RECQL
MCM10
UBE2V2
RAD51AP1
DEK
DDIAS
