# Supplementary material for: Chidamide Reverses Fluzoparib Resistance in Triple-Negative Breast Cancer Cells
Source: Front Oncol. 2022 Feb 18;12:819714. doi: 10.3389/fonc.2022.819714 (PMC8894594; doi:10.3389/fonc.2022.819714)
Supplement: Supplementary file 4 [file Table_2.xlsx]

## Sheet: Sheet1
	AnnexinV+/PI+				AnnexinV+/PI-
HCC1937-PBS	7.75	7.19	6.63		2.82	2.32	1.82
HCC1937-FR-PBS	4.71	5.34	4.15		0.99	0.62	1.26
Fluzoparib 30μg/ml	32.7	33.4	31.5		1.58	1.02	2.17
Chidamide 3μg/ml	23	23.5	21.1		2.58	3.16	2.01
Fluzoparib 30μg/ml+Chidamide 3μg/ml	51.8	52.7	50.4		1.62	1.25	1.86
MDA-MB-468-P-PBS	1.35	1.1	0.99		2.41	2.19	2.07
MDA-MB-468-FR-PBS	3.05	2.64	3.59		0.76	0.34	1.06
Fluzoparib 30μg/ml	11.8	11.07	12.39		3.28	2.75	3.75
Chidamide 6μg/ml	9.68	9.04	10.12		3.84	3.24	4.15
Fluzoparib 30μg/ml+Chidamide 6μg/ml	28.2	27.4	28.8		11.8	11.06	12.31
