# Supplementary material for: Chidamide Reverses Fluzoparib Resistance in Triple-Negative Breast Cancer Cells
Source: Front Oncol. 2022 Feb 18;12:819714. doi: 10.3389/fonc.2022.819714 (PMC8894594; doi:10.3389/fonc.2022.819714)
Supplement: Supplementary file 5 [file Table_3.xlsx]

## Sheet: Sheet1
	G1				G2				S
R60-PBS	55.88	54.68	53.78		6.69	5.68	4.13		40.78	39.64	38.74
R60- P	48.14	46.69	45.24		27.3	25.98	24.66		28.54	27.33	26.12
R60- H	64.79	63.42	62.05		19.31	17.85	16.39		20.08	18.73	17.38
R60 P+H	47.18	45.66	44.14		38.33	36.7	35.07		18.98	17.64	16.3
	G1				G2				S
PBS	47.2	45.82	44.44		1.25	0.67	0.09		54.97	53.51	52.05
Pi	75.33	73.84	72.35		9.36	7.58	5.8		19.94	18.58	17.22
Hi	77.01	75.52	74.03		6.2	4.58	2.96		21.47	19.9	18.33
P+H	74.79	73.75	72.71		17.96	16.69	15.42		11.13	9.56	7.99
