# Supplementary material for: Chidamide Reverses Fluzoparib Resistance in Triple-Negative Breast Cancer Cells
Source: Front Oncol. 2022 Feb 18;12:819714. doi: 10.3389/fonc.2022.819714 (PMC8894594; doi:10.3389/fonc.2022.819714)
Supplement: Supplementary file 6 [file Table_4.xlsx]

## Sheet: Sheet1
		HCC1937-FR					HCC1937-FR+Chidamide(3μg/ml)
0.390625		90.6931	98.7207	95.4545	84.5133		82.4468	93.418	95.025	90.211
0.78125		89.1089	97.4414	91.9093	84.7788		87.1915	78.8477	88.5898	88.5865
1.5625		88.1188	87.8678	91.8636	86.7699		83.9574	74.2617	71.2938	92.4219
3.125		75.9275	84.5107	82.6364	80.4077		69.1277	67.7891	81.5267	57.7595
6.25		72.396	80.8017	78.6818	82.8058		48.6808	53.0039	72.0033	49.8017
12.5		71.1881	83.7953	75.5909	70.1327		36.9362	34.543	46.309	51.9241
25		62.7723	69.1045	63.0334	76.9545		39.8936	34.7031	40.7073	44.7975
50		66.7921	64.0384	64.7589	47.5909		26.9149	22.9883	21.6703	19.5992
100		15.1188	11.1791	11.0909	12.4676		11.9149	14.1406	17.5898	20.4852
200		4.31683	5.42431	6	4.29736		10.7447	9.66797	10.6638	11.1814
		MDA-MB-468-FR					MDA-MB-468-FR+Chidamide(6μg/ml)
0.390625		90.2445	83.5161	95.8917	95.3866		89.7736	91.6735	95.375	82.522
0.78125		81.3221	90.1613	96.4331	91.4897		89.2642	97.234	86.5455	89.4903
1.5625		100.388	86.129	82.1656	98.9691		88.7736	88.7386	94.7159	72.8395
3.125		87.6546	92.9032	90.535	84.134		75.3774	84.5829	70.9659	84.9295
6.25		82.2355	91.8064	89.3376	76.7629		55.7358	77.176	59.6667	60.1429
12.5		76.48	81.0645	99.5223	76.3299		60.7925	54.3408	60.0265	55.0847
25		78.5576	88.3226	84.3248	71.4588		54.9623	40.3713	34.4962	31.1217
50		71.0091	73.5484	68.8535	83.3505		29.3774	28.1811	24.3977	25.0441
100		32.555	36.129	42.2612	36.5722		20.0943	13.4283	17.803	15.2557
200		19.9224	22.0968	22.293	19.0722		6.49057	8.15768	9.47727	6.49206
