# Supplementary material for: Chidamide Reverses Fluzoparib Resistance in Triple-Negative Breast Cancer Cells
Source: Front Oncol. 2022 Feb 18;12:819714. doi: 10.3389/fonc.2022.819714 (PMC8894594; doi:10.3389/fonc.2022.819714)
Supplement: Supplementary file 8 [file Table_6.xlsx]

## Sheet: Sheet1
		HCC1937					HCC1937-FR
0.390625		98.1297	90.3226	98.9597	94.969		95.3541	98.5389	98.0963	95.1625
0.78125		93.7743	95.3548	96.4395	97.7058		93.9551	94.0417	99.2995	98.1644
1.5625		87.6783	86.9677	91.1573	91.2281		89.81	91.2619	92.3783	92.6195
3.125		64.5914	66.5807	61.2484	65.3171		82.5561	87.0816	85.1138	88.9101
6.25		30.7393	31.0968	34.7204	31.309		72.0207	81.4042	72.5044	88.3365
12.5		26.5889	28.5161	26.658	29.8246		40.7599	50.8539	48.3362	46.0803
25		24.773	25.4194	24.9675	26.3158		33.506	39.0892	41.1559	42.065
50		26.3294	25.2903	25.0975	27.5304		30.3972	37.5712	33.0998	35.9465
100		26.5889	27.2258	24.0572	30.4993		25.5613	29.4118	29.4221	30.7839
200		17.1206	19.4839	18.3355	22.807		14.6805	16.3188	14.8862	16.0612
		MDA-MB-468					MDA-MB-468-FR
0.390625		10.9389	4.18108	7.5	1.40685		15.2574	16.3043	15.9213	15.3298
0.78125		8.61135	8.15768	13.3271	9.38116		23.5294	22.6449	24.6869	29.9465
1.5625		23.2533	13.4283	21.9626	18.5225		36.9485	36.7754	34.5259	34.0463
3.125		38.0175	23.3713	25.3598	20.3555		53.3088	50.1812	54.9195	56.328
6.25		39.5065	23.3408	44.5187	36.0942		49.6324	55.7971	58.8551	58.8235
12.5		66.8122	69.176	82.243	69.379		83.0294	81.058	86.9374	89.9144
25		91.1572	78.7386	92.1729	88.4368		92.8971	84.2174	81.3274	95.8271
50		88.869	88.5829	96.0421	92.9036		85.0147	93.4493	90.3453	90.975
100		89.4105	90.234	92.1308	89.728		95.8676	94.2391	87.4275	88.7879
200		98.1572	93.6735	96.4089	95.9101		94.3015	93.4493	89.7853	95.5312
