# Supplementary material for: Chidamide Reverses Fluzoparib Resistance in Triple-Negative Breast Cancer Cells
Source: Front Oncol. 2022 Feb 18;12:819714. doi: 10.3389/fonc.2022.819714 (PMC8894594; doi:10.3389/fonc.2022.819714)
Supplement: Supplementary file 9 [file Table_7.xlsx]

## Sheet: BP
#term ID	term description	observed gene count	background gene count	strength	false discovery rate	matching proteins in your network (IDs)	matching proteins in your network (labels)
GO:0006281	DNA repair	29	491	0.58	6.23e-07	9606.ENSP00000228843,9606.ENSP00000243326,9606.ENSP00000259008,9606.ENSP00000264233,9606.ENSP00000264596,9606.ENSP00000265140,9606.ENSP00000265849,9606.ENSP00000272342,9606.ENSP00000275053,9606.ENSP00000306999,9606.ENSP00000316176,9606.ENSP00000323889,9606.ENSP00000325863,9606.ENSP00000342307,9606.ENSP00000352271,9606.ENSP00000355958,9606.ENSP00000361043,9606.ENSP00000364855,9606.ENSP00000368164,…	RAD51AP1,RIF1,BRIP1,POLQ,NEIL3,ANKRD32,PMS2,ETAA1,MMS22L,ESCO2,UBE2N,TRIM25,MRE11A,FOXM1,XRCC2,DTL,RAD54L,MSH5,MCM8,POLA1,ISG15,RAD51,RFC4,CDKN2D,ANKLE1,FANCB,CDC7,RECQL,UBE2V2
GO:0006974	cellular response to DNA damage stimulus	34	749	0.46	9.01e-06	9606.ENSP00000228843,9606.ENSP00000243326,9606.ENSP00000259008,9606.ENSP00000263795,9606.ENSP00000264233,9606.ENSP00000264596,9606.ENSP00000265140,9606.ENSP00000265849,9606.ENSP00000272342,9606.ENSP00000275053,9606.ENSP00000306999,9606.ENSP00000313171,9606.ENSP00000316176,9606.ENSP00000323889,9606.ENSP00000325863,9606.ENSP00000335628,9606.ENSP00000337797,9606.ENSP00000342307,9606.ENSP00000352271,…	RAD51AP1,RIF1,BRIP1,WDR76,POLQ,NEIL3,ANKRD32,PMS2,ETAA1,MMS22L,ESCO2,ATAD5,UBE2N,TRIM25,MRE11A,SPDYA,PIDD1,FOXM1,XRCC2,DTL,RAD54L,MSH5,MCM8,POLA1,ISG15,RAD51,RFC4,CDKN2D,ANKLE1,FANCB,CDC7,RECQL,MCM10,UBE2V2
GO:0006302	double-strand break repair	16	178	0.76	9.18e-06	9606.ENSP00000228843,9606.ENSP00000243326,9606.ENSP00000259008,9606.ENSP00000264233,9606.ENSP00000275053,9606.ENSP00000306999,9606.ENSP00000316176,9606.ENSP00000325863,9606.ENSP00000352271,9606.ENSP00000361043,9606.ENSP00000368164,9606.ENSP00000368349,9606.ENSP00000372088,9606.ENSP00000393139,9606.ENSP00000416739,9606.ENSP00000428209	RAD51AP1,RIF1,BRIP1,POLQ,MMS22L,ESCO2,UBE2N,MRE11A,XRCC2,RAD54L,MCM8,POLA1,RAD51,CDC7,RECQL,UBE2V2
GO:0000724	double-strand break repair via homologous recombination	11	88	0.9	4.43e-05	9606.ENSP00000228843,9606.ENSP00000264233,9606.ENSP00000275053,9606.ENSP00000316176,9606.ENSP00000325863,9606.ENSP00000352271,9606.ENSP00000361043,9606.ENSP00000368164,9606.ENSP00000372088,9606.ENSP00000393139,9606.ENSP00000416739	RAD51AP1,POLQ,MMS22L,UBE2N,MRE11A,XRCC2,RAD54L,MCM8,RAD51,CDC7,RECQL
GO:2001020	regulation of response to DNA damage stimulus	15	188	0.71	6.79e-05	9606.ENSP00000228843,9606.ENSP00000243326,9606.ENSP00000263795,9606.ENSP00000264233,9606.ENSP00000265140,9606.ENSP00000272342,9606.ENSP00000313171,9606.ENSP00000316176,9606.ENSP00000342307,9606.ENSP00000372088,9606.ENSP00000377224,9606.ENSP00000377971,9606.ENSP00000380414,9606.ENSP00000428209,9606.ENSP00000435421	RAD51AP1,RIF1,WDR76,POLQ,ANKRD32,ETAA1,ATAD5,UBE2N,FOXM1,RAD51,CDKN2D,ANKLE1,DEK,UBE2V2,DDIAS
GO:0006282	regulation of DNA repair	9	101	0.76	0.003	9606.ENSP00000228843,9606.ENSP00000243326,9606.ENSP00000264233,9606.ENSP00000265140,9606.ENSP00000316176,9606.ENSP00000342307,9606.ENSP00000372088,9606.ENSP00000380414,9606.ENSP00000428209	RAD51AP1,RIF1,POLQ,ANKRD32,UBE2N,FOXM1,RAD51,DEK,UBE2V2
GO:2000779	regulation of double-strand break repair	7	59	0.88	0.0037	9606.ENSP00000228843,9606.ENSP00000243326,9606.ENSP00000264233,9606.ENSP00000265140,9606.ENSP00000342307,9606.ENSP00000372088,9606.ENSP00000380414	RAD51AP1,RIF1,POLQ,ANKRD32,FOXM1,RAD51,DEK
GO:0000731	DNA synthesis involved in DNA repair	6	50	0.88	0.0098	9606.ENSP00000323889,9606.ENSP00000355958,9606.ENSP00000368349,9606.ENSP00000368699,9606.ENSP00000376272,9606.ENSP00000377224	TRIM25,DTL,POLA1,ISG15,RFC4,CDKN2D
GO:0000729	DNA double-strand break processing	4	23	1.05	0.0295	9606.ENSP00000259008,9606.ENSP00000316176,9606.ENSP00000325863,9606.ENSP00000428209	BRIP1,UBE2N,MRE11A,UBE2V2
GO:0006303	double-strand break repair via nonhomologous end joining	6	66	0.76	0.0321	9606.ENSP00000243326,9606.ENSP00000264233,9606.ENSP00000316176,9606.ENSP00000325863,9606.ENSP00000368349,9606.ENSP00000428209	RIF1,POLQ,UBE2N,MRE11A,POLA1,UBE2V2
GO:0007049	cell cycle	75	1263	0.58	1.03e-19	9606.ENSP00000229758,9606.ENSP00000234091,9606.ENSP00000243326,9606.ENSP00000243706,9606.ENSP00000243786,9606.ENSP00000251496,9606.ENSP00000259008,9606.ENSP00000261597,9606.ENSP00000263181,9606.ENSP00000263753,9606.ENSP00000264220,9606.ENSP00000264982,9606.ENSP00000265148,9606.ENSP00000265728,9606.ENSP00000273853,9606.ENSP00000285735,9606.ENSP00000286398,9606.ENSP00000287482,9606.ENSP00000290130,…	FBXO5,ID2,RIF1,HAUS3,INHA,NCAPG,BRIP1,NDC80,KIF18A,SGOL1,PPAT,CEP70,CENPE,DBF4,CENPC,RHOC,SMC2,SASS6,MIS18A,BUB1,ESCO2,MIS18BP1,ATAD5,TYMS,SKA3,ENSG00000258947,KIF15,MRE11A,KNTC1,GPR132,CASC5,SPDYA,HORMAD2,CENPQ,PIDD1,FOXM1,SUV39H2,XRCC2,CENPF,NEK7,MKI67,TTK,CEP55,KIF20B,RAD54L,CCND3,AGO4,MSH5,MCM8,POLA1,CEP152,RAD51,RFC4,CDKN2D,HELLS,ANKLE1,UBXN2B,CDC7,DHFR,UBE2L3,GAS7,STMN1,MCM10,ANAPC13,EIF4E,…
GO:0022402	cell cycle process	60	890	0.63	8.63e-18	9606.ENSP00000229758,9606.ENSP00000234091,9606.ENSP00000243706,9606.ENSP00000243786,9606.ENSP00000251496,9606.ENSP00000259008,9606.ENSP00000261597,9606.ENSP00000263181,9606.ENSP00000263753,9606.ENSP00000264220,9606.ENSP00000264982,9606.ENSP00000265148,9606.ENSP00000265728,9606.ENSP00000273853,9606.ENSP00000285735,9606.ENSP00000286398,9606.ENSP00000287482,9606.ENSP00000302530,9606.ENSP00000313171,…	FBXO5,ID2,HAUS3,INHA,NCAPG,BRIP1,NDC80,KIF18A,SGOL1,PPAT,CEP70,CENPE,DBF4,CENPC,RHOC,SMC2,SASS6,BUB1,ATAD5,TYMS,MRE11A,KNTC1,GPR132,CASC5,SPDYA,HORMAD2,CENPQ,PIDD1,FOXM1,XRCC2,CENPF,NEK7,TTK,CEP55,KIF20B,AGO4,MSH5,MCM8,POLA1,CEP152,RAD51,RFC4,CDKN2D,ANKLE1,UBXN2B,CDC7,DHFR,UBE2L3,GAS7,STMN1,MCM10,EIF4E,CCNE2,MYBL1,DDIAS,CEP290,NUSAP1,ARPP19,NUP62,MIS12
GO:0000278	mitotic cell cycle	47	628	0.68	4.05e-15	9606.ENSP00000229758,9606.ENSP00000234091,9606.ENSP00000243706,9606.ENSP00000251496,9606.ENSP00000261597,9606.ENSP00000263181,9606.ENSP00000263753,9606.ENSP00000264220,9606.ENSP00000264982,9606.ENSP00000265148,9606.ENSP00000265728,9606.ENSP00000273853,9606.ENSP00000285735,9606.ENSP00000286398,9606.ENSP00000302530,9606.ENSP00000315644,9606.ENSP00000319417,9606.ENSP00000320295,9606.ENSP00000324020,…	FBXO5,ID2,HAUS3,NCAPG,NDC80,KIF18A,SGOL1,PPAT,CEP70,CENPE,DBF4,CENPC,RHOC,SMC2,BUB1,TYMS,SKA3,ENSG00000258947,KIF15,MRE11A,KNTC1,GPR132,SPDYA,PIDD1,FOXM1,XRCC2,CENPF,TTK,CEP55,MCM8,POLA1,CEP152,RAD51,CDKN2D,UBXN2B,CDC7,DHFR,STMN1,MCM10,EIF4E,CCNE2,MYBL1,CEP290,NUSAP1,ARPP19,NUP62,MIS12
GO:1903047	mitotic cell cycle process	42	564	0.68	2.66e-13	9606.ENSP00000229758,9606.ENSP00000234091,9606.ENSP00000243706,9606.ENSP00000251496,9606.ENSP00000261597,9606.ENSP00000263181,9606.ENSP00000263753,9606.ENSP00000264220,9606.ENSP00000264982,9606.ENSP00000265148,9606.ENSP00000265728,9606.ENSP00000273853,9606.ENSP00000285735,9606.ENSP00000286398,9606.ENSP00000302530,9606.ENSP00000315644,9606.ENSP00000325863,9606.ENSP00000328236,9606.ENSP00000328818,…	FBXO5,ID2,HAUS3,NCAPG,NDC80,KIF18A,SGOL1,PPAT,CEP70,CENPE,DBF4,CENPC,RHOC,SMC2,BUB1,TYMS,MRE11A,KNTC1,GPR132,SPDYA,PIDD1,FOXM1,CENPF,TTK,CEP55,MCM8,POLA1,CEP152,RAD51,CDKN2D,UBXN2B,CDC7,DHFR,STMN1,MCM10,EIF4E,CCNE2,CEP290,NUSAP1,ARPP19,NUP62,MIS12
GO:0007059	chromosome segregation	26	253	0.82	1.71e-10	9606.ENSP00000251496,9606.ENSP00000259008,9606.ENSP00000261597,9606.ENSP00000263181,9606.ENSP00000263753,9606.ENSP00000265148,9606.ENSP00000273853,9606.ENSP00000286398,9606.ENSP00000290130,9606.ENSP00000302530,9606.ENSP00000306999,9606.ENSP00000319417,9606.ENSP00000325863,9606.ENSP00000335463,9606.ENSP00000336984,9606.ENSP00000337289,9606.ENSP00000355922,9606.ENSP00000358813,9606.ENSP00000362306,…	NCAPG,BRIP1,NDC80,KIF18A,SGOL1,CENPE,CENPC,SMC2,MIS18A,BUB1,ESCO2,SKA3,MRE11A,CASC5,HORMAD2,CENPQ,CENPF,TTK,AGO4,MSH5,CENPN,ANKLE1,CCNE2,NUSAP1,NUP62,MIS12
GO:0098813	nuclear chromosome segregation	22	196	0.86	2.16e-09	9606.ENSP00000251496,9606.ENSP00000259008,9606.ENSP00000261597,9606.ENSP00000263181,9606.ENSP00000263753,9606.ENSP00000265148,9606.ENSP00000273853,9606.ENSP00000286398,9606.ENSP00000302530,9606.ENSP00000325863,9606.ENSP00000335463,9606.ENSP00000336984,9606.ENSP00000337289,9606.ENSP00000355922,9606.ENSP00000358813,9606.ENSP00000362306,9606.ENSP00000364855,9606.ENSP00000377971,9606.ENSP00000429089,…	NCAPG,BRIP1,NDC80,KIF18A,SGOL1,CENPE,CENPC,SMC2,BUB1,MRE11A,CASC5,HORMAD2,CENPQ,CENPF,TTK,AGO4,MSH5,ANKLE1,CCNE2,NUSAP1,NUP62,MIS12
GO:0000280	nuclear division	24	268	0.76	1.53e-08	9606.ENSP00000229758,9606.ENSP00000251496,9606.ENSP00000259008,9606.ENSP00000261597,9606.ENSP00000263181,9606.ENSP00000263753,9606.ENSP00000265148,9606.ENSP00000273853,9606.ENSP00000286398,9606.ENSP00000302530,9606.ENSP00000325863,9606.ENSP00000335628,9606.ENSP00000336984,9606.ENSP00000352271,9606.ENSP00000358813,9606.ENSP00000362306,9606.ENSP00000364855,9606.ENSP00000372088,9606.ENSP00000377971,…	FBXO5,NCAPG,BRIP1,NDC80,KIF18A,SGOL1,CENPE,CENPC,SMC2,BUB1,MRE11A,SPDYA,HORMAD2,XRCC2,TTK,AGO4,MSH5,RAD51,ANKLE1,CCNE2,MYBL1,NUSAP1,NUP62,MIS12
GO:0048285	organelle fission	25	294	0.74	1.53e-08	9606.ENSP00000229758,9606.ENSP00000251496,9606.ENSP00000259008,9606.ENSP00000261597,9606.ENSP00000263181,9606.ENSP00000263753,9606.ENSP00000264198,9606.ENSP00000265148,9606.ENSP00000273853,9606.ENSP00000286398,9606.ENSP00000302530,9606.ENSP00000325863,9606.ENSP00000335628,9606.ENSP00000336984,9606.ENSP00000352271,9606.ENSP00000358813,9606.ENSP00000362306,9606.ENSP00000364855,9606.ENSP00000372088,…	FBXO5,NCAPG,BRIP1,NDC80,KIF18A,SGOL1,MUL1,CENPE,CENPC,SMC2,BUB1,MRE11A,SPDYA,HORMAD2,XRCC2,TTK,AGO4,MSH5,RAD51,ANKLE1,CCNE2,MYBL1,NUSAP1,NUP62,MIS12
GO:0140013	meiotic nuclear division	18	146	0.9	3.47e-08	9606.ENSP00000229758,9606.ENSP00000259008,9606.ENSP00000263181,9606.ENSP00000263753,9606.ENSP00000273853,9606.ENSP00000286398,9606.ENSP00000302530,9606.ENSP00000325863,9606.ENSP00000335628,9606.ENSP00000336984,9606.ENSP00000352271,9606.ENSP00000358813,9606.ENSP00000362306,9606.ENSP00000364855,9606.ENSP00000372088,9606.ENSP00000377971,9606.ENSP00000429089,9606.ENSP00000429633	FBXO5,BRIP1,KIF18A,SGOL1,CENPC,SMC2,BUB1,MRE11A,SPDYA,HORMAD2,XRCC2,TTK,AGO4,MSH5,RAD51,ANKLE1,CCNE2,MYBL1
GO:0034508	centromere complex assembly	12	50	1.19	5.85e-08	9606.ENSP00000265148,9606.ENSP00000273853,9606.ENSP00000290130,9606.ENSP00000309790,9606.ENSP00000335463,9606.ENSP00000337289,9606.ENSP00000355922,9606.ENSP00000364737,9606.ENSP00000377007,9606.ENSP00000377601,9606.ENSP00000379911,9606.ENSP00000484532	CENPE,CENPC,MIS18A,MIS18BP1,CASC5,CENPQ,CENPF,CENPP,CENPN,HELLS,CENPK,MIS12
GO:0006259	DNA metabolic process	39	773	0.51	1.05e-07	9606.ENSP00000228843,9606.ENSP00000243326,9606.ENSP00000259008,9606.ENSP00000264233,9606.ENSP00000264596,9606.ENSP00000265140,9606.ENSP00000265728,9606.ENSP00000265849,9606.ENSP00000272342,9606.ENSP00000275053,9606.ENSP00000306999,9606.ENSP00000313171,9606.ENSP00000315644,9606.ENSP00000316176,9606.ENSP00000323889,9606.ENSP00000325863,9606.ENSP00000342307,9606.ENSP00000352271,9606.ENSP00000355922,…	RAD51AP1,RIF1,BRIP1,POLQ,NEIL3,ANKRD32,DBF4,PMS2,ETAA1,MMS22L,ESCO2,ATAD5,TYMS,UBE2N,TRIM25,MRE11A,FOXM1,XRCC2,CENPF,DTL,RAD54L,MSH5,MCM8,POLA1,ISG15,RAD51,RFC4,CDKN2D,HELLS,ANKLE1,FANCB,CDC7,EXOSC6,GINS3,BEND3,RECQL,MCM10,UBE2V2,CCNE2
GO:0044770	cell cycle phase transition	22	263	0.73	1.87e-07	9606.ENSP00000229758,9606.ENSP00000234091,9606.ENSP00000243706,9606.ENSP00000264220,9606.ENSP00000264982,9606.ENSP00000265728,9606.ENSP00000315644,9606.ENSP00000328818,9606.ENSP00000335628,9606.ENSP00000342307,9606.ENSP00000368164,9606.ENSP00000368349,9606.ENSP00000370337,9606.ENSP00000377224,9606.ENSP00000393139,9606.ENSP00000396308,9606.ENSP00000400906,9606.ENSP00000418268,9606.ENSP00000425561,…	FBXO5,ID2,HAUS3,PPAT,CEP70,DBF4,TYMS,GPR132,SPDYA,FOXM1,MCM8,POLA1,CEP152,CDKN2D,CDC7,DHFR,UBE2L3,MCM10,EIF4E,CCNE2,CEP290,ARPP19
GO:0044772	mitotic cell cycle phase transition	21	254	0.72	5.22e-07	9606.ENSP00000229758,9606.ENSP00000234091,9606.ENSP00000243706,9606.ENSP00000264220,9606.ENSP00000264982,9606.ENSP00000265728,9606.ENSP00000315644,9606.ENSP00000328818,9606.ENSP00000335628,9606.ENSP00000342307,9606.ENSP00000368164,9606.ENSP00000368349,9606.ENSP00000370337,9606.ENSP00000377224,9606.ENSP00000393139,9606.ENSP00000396308,9606.ENSP00000418268,9606.ENSP00000425561,9606.ENSP00000429089,…	FBXO5,ID2,HAUS3,PPAT,CEP70,DBF4,TYMS,GPR132,SPDYA,FOXM1,MCM8,POLA1,CEP152,CDKN2D,CDC7,DHFR,MCM10,EIF4E,CCNE2,CEP290,ARPP19
GO:0051383	kinetochore organization	8	17	1.48	6.23e-07	9606.ENSP00000261597,9606.ENSP00000265148,9606.ENSP00000273853,9606.ENSP00000286398,9606.ENSP00000355922,9606.ENSP00000377007,9606.ENSP00000379911,9606.ENSP00000484532	NDC80,CENPE,CENPC,SMC2,CENPF,CENPN,CENPK,MIS12
GO:0000082	G1/S transition of mitotic cell cycle	15	123	0.89	8.1e-07	9606.ENSP00000229758,9606.ENSP00000234091,9606.ENSP00000264220,9606.ENSP00000265728,9606.ENSP00000315644,9606.ENSP00000328818,9606.ENSP00000335628,9606.ENSP00000368164,9606.ENSP00000368349,9606.ENSP00000377224,9606.ENSP00000393139,9606.ENSP00000396308,9606.ENSP00000418268,9606.ENSP00000425561,9606.ENSP00000429089	FBXO5,ID2,PPAT,DBF4,TYMS,GPR132,SPDYA,MCM8,POLA1,CDKN2D,CDC7,DHFR,MCM10,EIF4E,CCNE2
GO:0051321	meiotic cell cycle	19	214	0.75	8.29e-07	9606.ENSP00000229758,9606.ENSP00000259008,9606.ENSP00000263181,9606.ENSP00000263753,9606.ENSP00000273853,9606.ENSP00000286398,9606.ENSP00000302530,9606.ENSP00000325863,9606.ENSP00000335628,9606.ENSP00000336984,9606.ENSP00000352271,9606.ENSP00000358813,9606.ENSP00000361043,9606.ENSP00000362306,9606.ENSP00000364855,9606.ENSP00000372088,9606.ENSP00000377971,9606.ENSP00000429089,9606.ENSP00000429633	FBXO5,BRIP1,KIF18A,SGOL1,CENPC,SMC2,BUB1,MRE11A,SPDYA,HORMAD2,XRCC2,TTK,RAD54L,AGO4,MSH5,RAD51,ANKLE1,CCNE2,MYBL1
GO:0051301	cell division	28	483	0.57	1.34e-06	9606.ENSP00000229758,9606.ENSP00000243706,9606.ENSP00000251496,9606.ENSP00000259008,9606.ENSP00000261597,9606.ENSP00000263753,9606.ENSP00000265148,9606.ENSP00000273853,9606.ENSP00000285735,9606.ENSP00000286398,9606.ENSP00000290130,9606.ENSP00000302530,9606.ENSP00000309790,9606.ENSP00000319417,9606.ENSP00000328236,9606.ENSP00000335463,9606.ENSP00000355922,9606.ENSP00000360540,9606.ENSP00000360793,…	FBXO5,HAUS3,NCAPG,BRIP1,NDC80,SGOL1,CENPE,CENPC,RHOC,SMC2,MIS18A,BUB1,MIS18BP1,SKA3,KNTC1,CASC5,CENPF,CEP55,KIF20B,CCND3,HELLS,CDC7,STMN1,ANAPC13,CCNE2,NUSAP1,ARPP19,MIS12
GO:0045132	meiotic chromosome segregation	12	85	0.96	5.69e-06	9606.ENSP00000259008,9606.ENSP00000263753,9606.ENSP00000273853,9606.ENSP00000286398,9606.ENSP00000302530,9606.ENSP00000325863,9606.ENSP00000336984,9606.ENSP00000358813,9606.ENSP00000362306,9606.ENSP00000364855,9606.ENSP00000377971,9606.ENSP00000429089	BRIP1,SGOL1,CENPC,SMC2,BUB1,MRE11A,HORMAD2,TTK,AGO4,MSH5,ANKLE1,CCNE2
GO:0051726	regulation of cell cycle	44	1129	0.4	6.81e-06	9606.ENSP00000229758,9606.ENSP00000234091,9606.ENSP00000243706,9606.ENSP00000243786,9606.ENSP00000259008,9606.ENSP00000261597,9606.ENSP00000263795,9606.ENSP00000264982,9606.ENSP00000265140,9606.ENSP00000265148,9606.ENSP00000272342,9606.ENSP00000302530,9606.ENSP00000313171,9606.ENSP00000325863,9606.ENSP00000328236,9606.ENSP00000328818,9606.ENSP00000330382,9606.ENSP00000335628,9606.ENSP00000337797,…	FBXO5,ID2,HAUS3,INHA,BRIP1,NDC80,WDR76,CEP70,ANKRD32,CENPE,ETAA1,BUB1,ATAD5,MRE11A,KNTC1,GPR132,PDGFB,SPDYA,PIDD1,NPR2,FOXM1,CALM1,CENPF,DTL,NEK7,MKI67,TTK,KIF20B,CCND3,TMEM8B,CEP152,RAD51,CDKN2D,UBXN2B,CDC7,GAS7,EIF4E,CCNE2,TRNP1,DDIAS,CEP290,NUSAP1,BOP1,NUP62
GO:0031055	chromatin remodeling at centromere	9	46	1.1	2.22e-05	9606.ENSP00000273853,9606.ENSP00000290130,9606.ENSP00000309790,9606.ENSP00000335463,9606.ENSP00000337289,9606.ENSP00000364737,9606.ENSP00000377007,9606.ENSP00000377601,9606.ENSP00000379911	CENPC,MIS18A,MIS18BP1,CASC5,CENPQ,CENPP,CENPN,HELLS,CENPK
GO:0000819	sister chromatid segregation	13	123	0.83	2.73e-05	9606.ENSP00000251496,9606.ENSP00000261597,9606.ENSP00000263181,9606.ENSP00000263753,9606.ENSP00000265148,9606.ENSP00000273853,9606.ENSP00000286398,9606.ENSP00000302530,9606.ENSP00000325863,9606.ENSP00000336984,9606.ENSP00000453403,9606.ENSP00000471191,9606.ENSP00000484532	NCAPG,NDC80,KIF18A,SGOL1,CENPE,CENPC,SMC2,BUB1,MRE11A,HORMAD2,NUSAP1,NUP62,MIS12
GO:0007346	regulation of mitotic cell cycle	29	608	0.48	2.93e-05	9606.ENSP00000229758,9606.ENSP00000234091,9606.ENSP00000243706,9606.ENSP00000261597,9606.ENSP00000264982,9606.ENSP00000265140,9606.ENSP00000265148,9606.ENSP00000302530,9606.ENSP00000313171,9606.ENSP00000325863,9606.ENSP00000328236,9606.ENSP00000328818,9606.ENSP00000330382,9606.ENSP00000337797,9606.ENSP00000355922,9606.ENSP00000355958,9606.ENSP00000356355,9606.ENSP00000357643,9606.ENSP00000358813,…	FBXO5,ID2,HAUS3,NDC80,CEP70,ANKRD32,CENPE,BUB1,ATAD5,MRE11A,KNTC1,GPR132,PDGFB,PIDD1,CENPF,DTL,NEK7,MKI67,TTK,KIF20B,TMEM8B,CEP152,CDKN2D,UBXN2B,CDC7,EIF4E,CEP290,NUSAP1,NUP62
GO:0051382	kinetochore assembly	6	13	1.47	3.83e-05	9606.ENSP00000265148,9606.ENSP00000273853,9606.ENSP00000355922,9606.ENSP00000377007,9606.ENSP00000379911,9606.ENSP00000484532	CENPE,CENPC,CENPF,CENPN,CENPK,MIS12
GO:0070192	chromosome organization involved in meiotic cell cycle	10	67	0.98	3.83e-05	9606.ENSP00000259008,9606.ENSP00000286398,9606.ENSP00000302530,9606.ENSP00000325863,9606.ENSP00000336984,9606.ENSP00000362306,9606.ENSP00000364855,9606.ENSP00000372088,9606.ENSP00000377971,9606.ENSP00000429089	BRIP1,SMC2,BUB1,MRE11A,HORMAD2,AGO4,MSH5,RAD51,ANKLE1,CCNE2
GO:0006260	DNA replication	16	203	0.7	3.89e-05	9606.ENSP00000259008,9606.ENSP00000264233,9606.ENSP00000265728,9606.ENSP00000272342,9606.ENSP00000275053,9606.ENSP00000313171,9606.ENSP00000325863,9606.ENSP00000355958,9606.ENSP00000368164,9606.ENSP00000368349,9606.ENSP00000372088,9606.ENSP00000376272,9606.ENSP00000393139,9606.ENSP00000401018,9606.ENSP00000418268,9606.ENSP00000429089	BRIP1,POLQ,DBF4,ETAA1,MMS22L,ATAD5,MRE11A,DTL,MCM8,POLA1,RAD51,RFC4,CDC7,GINS3,MCM10,CCNE2
GO:0007088	regulation of mitotic nuclear division	14	160	0.75	6.13e-05	9606.ENSP00000229758,9606.ENSP00000261597,9606.ENSP00000265140,9606.ENSP00000265148,9606.ENSP00000302530,9606.ENSP00000328236,9606.ENSP00000330382,9606.ENSP00000355922,9606.ENSP00000357643,9606.ENSP00000358813,9606.ENSP00000360793,9606.ENSP00000382507,9606.ENSP00000453403,9606.ENSP00000471191	FBXO5,NDC80,ANKRD32,CENPE,BUB1,KNTC1,PDGFB,CENPF,MKI67,TTK,KIF20B,UBXN2B,NUSAP1,NUP62
GO:0006261	DNA-dependent DNA replication	12	114	0.83	6.45e-05	9606.ENSP00000264233,9606.ENSP00000272342,9606.ENSP00000275053,9606.ENSP00000313171,9606.ENSP00000368164,9606.ENSP00000368349,9606.ENSP00000372088,9606.ENSP00000376272,9606.ENSP00000393139,9606.ENSP00000401018,9606.ENSP00000418268,9606.ENSP00000429089	POLQ,ETAA1,MMS22L,ATAD5,MCM8,POLA1,RAD51,RFC4,CDC7,GINS3,MCM10,CCNE2
GO:0034080	CENP-A containing nucleosome assembly	8	42	1.09	9.22e-05	9606.ENSP00000273853,9606.ENSP00000290130,9606.ENSP00000309790,9606.ENSP00000335463,9606.ENSP00000337289,9606.ENSP00000364737,9606.ENSP00000377007,9606.ENSP00000379911	CENPC,MIS18A,MIS18BP1,CASC5,CENPQ,CENPP,CENPN,CENPK
GO:0051052	regulation of DNA metabolic process	21	381	0.55	0.00012	9606.ENSP00000228843,9606.ENSP00000243326,9606.ENSP00000264233,9606.ENSP00000265140,9606.ENSP00000290130,9606.ENSP00000306999,9606.ENSP00000313171,9606.ENSP00000316176,9606.ENSP00000325863,9606.ENSP00000330382,9606.ENSP00000342307,9606.ENSP00000356355,9606.ENSP00000361359,9606.ENSP00000370224,9606.ENSP00000372088,9606.ENSP00000373574,9606.ENSP00000376272,9606.ENSP00000380414,9606.ENSP00000393139,…	RAD51AP1,RIF1,POLQ,ANKRD32,MIS18A,ESCO2,ATAD5,UBE2N,MRE11A,PDGFB,FOXM1,NEK7,CD40,PARM1,RAD51,ACVRL1,RFC4,DEK,CDC7,EXOSC6,UBE2V2
GO:0071103	DNA conformation change	17	257	0.63	0.00013	9606.ENSP00000251496,9606.ENSP00000259008,9606.ENSP00000273853,9606.ENSP00000286398,9606.ENSP00000290130,9606.ENSP00000309790,9606.ENSP00000325863,9606.ENSP00000335463,9606.ENSP00000337289,9606.ENSP00000361043,9606.ENSP00000364737,9606.ENSP00000372088,9606.ENSP00000377007,9606.ENSP00000377601,9606.ENSP00000379911,9606.ENSP00000416739,9606.ENSP00000453403	NCAPG,BRIP1,CENPC,SMC2,MIS18A,MIS18BP1,MRE11A,CASC5,CENPQ,RAD54L,CENPP,RAD51,CENPN,HELLS,CENPK,RECQL,NUSAP1
GO:0006310	DNA recombination	15	202	0.68	0.00014	9606.ENSP00000228843,9606.ENSP00000259008,9606.ENSP00000264233,9606.ENSP00000275053,9606.ENSP00000313171,9606.ENSP00000316176,9606.ENSP00000325863,9606.ENSP00000352271,9606.ENSP00000361043,9606.ENSP00000364855,9606.ENSP00000368164,9606.ENSP00000372088,9606.ENSP00000393139,9606.ENSP00000398597,9606.ENSP00000416739	RAD51AP1,BRIP1,POLQ,MMS22L,ATAD5,UBE2N,MRE11A,XRCC2,RAD54L,MSH5,MCM8,RAD51,CDC7,EXOSC6,RECQL
GO:0051276	chromosome organization	37	999	0.37	0.00016	9606.ENSP00000243326,9606.ENSP00000251496,9606.ENSP00000259008,9606.ENSP00000261597,9606.ENSP00000263181,9606.ENSP00000263753,9606.ENSP00000265148,9606.ENSP00000273853,9606.ENSP00000286398,9606.ENSP00000290130,9606.ENSP00000302530,9606.ENSP00000309790,9606.ENSP00000316176,9606.ENSP00000325863,9606.ENSP00000335463,9606.ENSP00000336984,9606.ENSP00000337289,9606.ENSP00000346997,9606.ENSP00000355922,…	RIF1,NCAPG,BRIP1,NDC80,KIF18A,SGOL1,CENPE,CENPC,SMC2,MIS18A,BUB1,MIS18BP1,UBE2N,MRE11A,CASC5,HORMAD2,CENPQ,SUV39H2,CENPF,RAD54L,AGO4,CENPP,MSH5,POLA1,RAD51,RFC4,CENPN,HELLS,ANKLE1,CENPK,DEK,BEND3,RECQL,CCNE2,NUSAP1,NUP62,MIS12
GO:0007127	meiosis I	11	106	0.82	0.00018	9606.ENSP00000229758,9606.ENSP00000259008,9606.ENSP00000273853,9606.ENSP00000325863,9606.ENSP00000352271,9606.ENSP00000362306,9606.ENSP00000364855,9606.ENSP00000372088,9606.ENSP00000377971,9606.ENSP00000429089,9606.ENSP00000429633	FBXO5,BRIP1,CENPC,MRE11A,XRCC2,AGO4,MSH5,RAD51,ANKLE1,CCNE2,MYBL1
GO:0010564	regulation of cell cycle process	29	684	0.43	0.00018	9606.ENSP00000229758,9606.ENSP00000234091,9606.ENSP00000243706,9606.ENSP00000261597,9606.ENSP00000264982,9606.ENSP00000265140,9606.ENSP00000265148,9606.ENSP00000302530,9606.ENSP00000313171,9606.ENSP00000325863,9606.ENSP00000328236,9606.ENSP00000328818,9606.ENSP00000330382,9606.ENSP00000337797,9606.ENSP00000342307,9606.ENSP00000349467,9606.ENSP00000355922,9606.ENSP00000355958,9606.ENSP00000357643,…	FBXO5,ID2,HAUS3,NDC80,CEP70,ANKRD32,CENPE,BUB1,ATAD5,MRE11A,KNTC1,GPR132,PDGFB,PIDD1,FOXM1,CALM1,CENPF,DTL,MKI67,TTK,KIF20B,CEP152,RAD51,CDKN2D,UBXN2B,CDC7,CEP290,NUSAP1,NUP62
GO:0008608	attachment of spindle microtubules to kinetochore	6	20	1.28	0.00019	9606.ENSP00000261597,9606.ENSP00000263753,9606.ENSP00000265148,9606.ENSP00000273853,9606.ENSP00000335463,9606.ENSP00000484532	NDC80,SGOL1,CENPE,CENPC,CASC5,MIS12
GO:0051054	positive regulation of DNA metabolic process	15	209	0.66	0.00019	9606.ENSP00000243326,9606.ENSP00000265140,9606.ENSP00000313171,9606.ENSP00000316176,9606.ENSP00000325863,9606.ENSP00000330382,9606.ENSP00000342307,9606.ENSP00000356355,9606.ENSP00000361359,9606.ENSP00000370224,9606.ENSP00000372088,9606.ENSP00000376272,9606.ENSP00000393139,9606.ENSP00000398597,9606.ENSP00000428209	RIF1,ANKRD32,ATAD5,UBE2N,MRE11A,PDGFB,FOXM1,NEK7,CD40,PARM1,RAD51,RFC4,CDC7,EXOSC6,UBE2V2
GO:0006996	organelle organization	81	3131	0.22	0.00021	9606.ENSP00000229758,9606.ENSP00000243326,9606.ENSP00000243706,9606.ENSP00000251496,9606.ENSP00000257861,9606.ENSP00000259008,9606.ENSP00000261597,9606.ENSP00000262225,9606.ENSP00000263181,9606.ENSP00000263753,9606.ENSP00000263774,9606.ENSP00000264198,9606.ENSP00000264982,9606.ENSP00000265148,9606.ENSP00000273853,9606.ENSP00000274364,9606.ENSP00000274498,9606.ENSP00000286398,9606.ENSP00000287482,…	FBXO5,RIF1,HAUS3,NCAPG,AVIL,BRIP1,NDC80,TMED2,KIF18A,SGOL1,NDUFS3,MUL1,CEP70,CENPE,CENPC,IQGAP2,ARHGAP26,SMC2,SASS6,MIS18A,ABI2,ATP5L,VPS37C,BUB1,RAC3,RFX2,MIS18BP1,NAGPA,UBE2N,ENSG00000258947,MRE11A,CASC5,SPDYA,HORMAD2,CENPQ,SNCA,SUV39H2,XRCC2,MT-ND4,CENPF,NEK7,RC3H1,PYGO2,TTK,RAD54L,AGO4,EPB41L4B,CENPP,MSH5,POLA1,APOO,CEP152,YWHAQ,RAD51,RFC4,CENPN,HELLS,RPL24,ANKLE1,TYMP,VAMP1,CENPK,DEK,MGARP,U…
GO:0051310	metaphase plate congression	8	51	1	0.00025	9606.ENSP00000261597,9606.ENSP00000263181,9606.ENSP00000265148,9606.ENSP00000273853,9606.ENSP00000337289,9606.ENSP00000355922,9606.ENSP00000471191,9606.ENSP00000484532	NDC80,KIF18A,CENPE,CENPC,CENPQ,CENPF,NUP62,MIS12
GO:0051303	establishment of chromosome localization	9	72	0.9	0.00032	9606.ENSP00000261597,9606.ENSP00000263181,9606.ENSP00000265148,9606.ENSP00000273853,9606.ENSP00000337289,9606.ENSP00000355922,9606.ENSP00000377971,9606.ENSP00000471191,9606.ENSP00000484532	NDC80,KIF18A,CENPE,CENPC,CENPQ,CENPF,ANKLE1,NUP62,MIS12
GO:0071897	DNA biosynthetic process	10	95	0.83	0.00036	9606.ENSP00000264233,9606.ENSP00000315644,9606.ENSP00000323889,9606.ENSP00000325863,9606.ENSP00000355922,9606.ENSP00000355958,9606.ENSP00000368349,9606.ENSP00000368699,9606.ENSP00000376272,9606.ENSP00000377224	POLQ,TYMS,TRIM25,MRE11A,CENPF,DTL,POLA1,ISG15,RFC4,CDKN2D
GO:0000070	mitotic sister chromatid segregation	10	101	0.8	0.00057	9606.ENSP00000251496,9606.ENSP00000261597,9606.ENSP00000263181,9606.ENSP00000263753,9606.ENSP00000265148,9606.ENSP00000273853,9606.ENSP00000286398,9606.ENSP00000453403,9606.ENSP00000471191,9606.ENSP00000484532	NCAPG,NDC80,KIF18A,SGOL1,CENPE,CENPC,SMC2,NUSAP1,NUP62,MIS12
GO:0033554	cellular response to stress	47	1553	0.29	0.00087	9606.ENSP00000228843,9606.ENSP00000234091,9606.ENSP00000243326,9606.ENSP00000254898,9606.ENSP00000259008,9606.ENSP00000263795,9606.ENSP00000264198,9606.ENSP00000264233,9606.ENSP00000264596,9606.ENSP00000265131,9606.ENSP00000265140,9606.ENSP00000265849,9606.ENSP00000272342,9606.ENSP00000275053,9606.ENSP00000306999,9606.ENSP00000313171,9606.ENSP00000316176,9606.ENSP00000323889,9606.ENSP00000325863,…	RAD51AP1,ID2,RIF1,MATN2,BRIP1,WDR76,MUL1,POLQ,NEIL3,TNC,ANKRD32,PMS2,ETAA1,MMS22L,ESCO2,ATAD5,UBE2N,TRIM25,MRE11A,SPDYA,PIDD1,SNCA,FOXM1,SUV39H2,XRCC2,DTL,CREB3L4,RAD54L,ASS1,MSH5,MCM8,POLA1,ISG15,SOD3,RAD51,RFC4,CDKN2D,ANKLE1,FANCB,MGARP,CDC7,DHFR,CHAC1,GPX1,RECQL,MCM10,UBE2V2
GO:0065004	protein-DNA complex assembly	14	223	0.6	0.0012	9606.ENSP00000265148,9606.ENSP00000273853,9606.ENSP00000290130,9606.ENSP00000309790,9606.ENSP00000335463,9606.ENSP00000337289,9606.ENSP00000352271,9606.ENSP00000355922,9606.ENSP00000364737,9606.ENSP00000372088,9606.ENSP00000377007,9606.ENSP00000377601,9606.ENSP00000379911,9606.ENSP00000484532	CENPE,CENPC,MIS18A,MIS18BP1,CASC5,CENPQ,XRCC2,CENPF,CENPP,RAD51,CENPN,HELLS,CENPK,MIS12
GO:1901990	regulation of mitotic cell cycle phase transition	18	351	0.52	0.0012	9606.ENSP00000234091,9606.ENSP00000243706,9606.ENSP00000261597,9606.ENSP00000264982,9606.ENSP00000265148,9606.ENSP00000302530,9606.ENSP00000313171,9606.ENSP00000325863,9606.ENSP00000328236,9606.ENSP00000328818,9606.ENSP00000337797,9606.ENSP00000355922,9606.ENSP00000355958,9606.ENSP00000358813,9606.ENSP00000370337,9606.ENSP00000377224,9606.ENSP00000393139,9606.ENSP00000448012	ID2,HAUS3,NDC80,CEP70,CENPE,BUB1,ATAD5,MRE11A,KNTC1,GPR132,PIDD1,CENPF,DTL,TTK,CEP152,CDKN2D,CDC7,CEP290
GO:0071840	cellular component organization or biogenesis	117	5342	0.15	0.0015	9606.ENSP00000225964,9606.ENSP00000229758,9606.ENSP00000234091,9606.ENSP00000243326,9606.ENSP00000243706,9606.ENSP00000246229,9606.ENSP00000251496,9606.ENSP00000252087,9606.ENSP00000254898,9606.ENSP00000257861,9606.ENSP00000259008,9606.ENSP00000261597,9606.ENSP00000261681,9606.ENSP00000262225,9606.ENSP00000263181,9606.ENSP00000263314,9606.ENSP00000263753,9606.ENSP00000263774,9606.ENSP00000264198,…	COL1A1,FBXO5,ID2,RIF1,HAUS3,PLAGL2,NCAPG,PCDHGC5,MATN2,AVIL,BRIP1,NDC80,MPP5,TMED2,KIF18A,P2RX3,SGOL1,NDUFS3,MUL1,PPAT,POLQ,CEP70,TNC,CENPE,CENPC,IQGAP2,MEGF10,ARHGAP26,SCUBE3,RHOC,SMC2,SASS6,MIS18A,ABI2,ATP5L,SOAT2,VPS37C,BUB1,NRTN,RAC3,CD2BP2,RFX2,B3GNT1,MIS18BP1,NAGPA,UBE2N,ENSG00000258947,MRE11A,KNTC1,CADM1,PDGFB,CASC5,SPDYA,HORMAD2,CENPQ,SNCA,LRRC8D,LYAR,SUV39H2,XRCC2,MT-ND4,CENPF,NEK7,RC3H1…
GO:0016043	cellular component organization	113	5163	0.15	0.0024	9606.ENSP00000225964,9606.ENSP00000229758,9606.ENSP00000234091,9606.ENSP00000243326,9606.ENSP00000243706,9606.ENSP00000246229,9606.ENSP00000251496,9606.ENSP00000252087,9606.ENSP00000254898,9606.ENSP00000257861,9606.ENSP00000259008,9606.ENSP00000261597,9606.ENSP00000261681,9606.ENSP00000262225,9606.ENSP00000263181,9606.ENSP00000263314,9606.ENSP00000263753,9606.ENSP00000263774,9606.ENSP00000264198,…	COL1A1,FBXO5,ID2,RIF1,HAUS3,PLAGL2,NCAPG,PCDHGC5,MATN2,AVIL,BRIP1,NDC80,MPP5,TMED2,KIF18A,P2RX3,SGOL1,NDUFS3,MUL1,PPAT,POLQ,CEP70,TNC,CENPE,CENPC,IQGAP2,MEGF10,ARHGAP26,SCUBE3,RHOC,SMC2,SASS6,MIS18A,ABI2,ATP5L,SOAT2,VPS37C,BUB1,NRTN,RAC3,CD2BP2,RFX2,B3GNT1,MIS18BP1,NAGPA,UBE2N,ENSG00000258947,MRE11A,KNTC1,CADM1,PDGFB,CASC5,SPDYA,HORMAD2,CENPQ,SNCA,LRRC8D,SUV39H2,XRCC2,MT-ND4,CENPF,NEK7,RC3H1,PYGO…
GO:0000018	regulation of DNA recombination	8	76	0.83	0.0027	9606.ENSP00000228843,9606.ENSP00000243326,9606.ENSP00000264233,9606.ENSP00000313171,9606.ENSP00000325863,9606.ENSP00000361359,9606.ENSP00000372088,9606.ENSP00000398597	RAD51AP1,RIF1,POLQ,ATAD5,MRE11A,CD40,RAD51,EXOSC6
GO:0051315	attachment of mitotic spindle microtubules to kinetochore	4	10	1.41	0.0029	9606.ENSP00000261597,9606.ENSP00000265148,9606.ENSP00000273853,9606.ENSP00000484532	NDC80,CENPE,CENPC,MIS12
GO:0006338	chromatin remodeling	11	156	0.65	0.0033	9606.ENSP00000273853,9606.ENSP00000290130,9606.ENSP00000309790,9606.ENSP00000335463,9606.ENSP00000337289,9606.ENSP00000346997,9606.ENSP00000364737,9606.ENSP00000377007,9606.ENSP00000377601,9606.ENSP00000379911,9606.ENSP00000380414	CENPC,MIS18A,MIS18BP1,CASC5,CENPQ,SUV39H2,CENPP,CENPN,HELLS,CENPK,DEK
GO:0045143	homologous chromosome segregation	7	58	0.89	0.0034	9606.ENSP00000259008,9606.ENSP00000273853,9606.ENSP00000325863,9606.ENSP00000362306,9606.ENSP00000364855,9606.ENSP00000377971,9606.ENSP00000429089	BRIP1,CENPC,MRE11A,AGO4,MSH5,ANKLE1,CCNE2
GO:0006323	DNA packaging	12	195	0.59	0.0048	9606.ENSP00000251496,9606.ENSP00000273853,9606.ENSP00000286398,9606.ENSP00000290130,9606.ENSP00000309790,9606.ENSP00000335463,9606.ENSP00000337289,9606.ENSP00000364737,9606.ENSP00000377007,9606.ENSP00000377601,9606.ENSP00000379911,9606.ENSP00000453403	NCAPG,CENPC,SMC2,MIS18A,MIS18BP1,CASC5,CENPQ,CENPP,CENPN,HELLS,CENPK,NUSAP1
GO:0007080	mitotic metaphase plate congression	6	42	0.96	0.0048	9606.ENSP00000261597,9606.ENSP00000263181,9606.ENSP00000265148,9606.ENSP00000273853,9606.ENSP00000471191,9606.ENSP00000484532	NDC80,KIF18A,CENPE,CENPC,NUP62,MIS12
GO:0008283	cell population proliferation	25	676	0.37	0.0048	9606.ENSP00000234091,9606.ENSP00000274473,9606.ENSP00000302530,9606.ENSP00000313171,9606.ENSP00000324020,9606.ENSP00000325863,9606.ENSP00000336721,9606.ENSP00000355922,9606.ENSP00000356669,9606.ENSP00000357643,9606.ENSP00000361359,9606.ENSP00000362082,9606.ENSP00000365433,9606.ENSP00000368349,9606.ENSP00000373574,9606.ENSP00000377601,9606.ENSP00000377862,9606.ENSP00000400906,9606.ENSP00000407375,…	ID2,MEGF10,BUB1,ATAD5,KIF15,MRE11A,LARP1,CENPF,RC3H1,MKI67,CD40,CCND3,TCF19,POLA1,ACVRL1,HELLS,FAT4,UBE2L3,GPX1,MUSTN1,TGFBI,MCM10,UBE2V2,TRNP1,BOP1
GO:0033273	response to vitamin	8	87	0.77	0.0055	9606.ENSP00000225964,9606.ENSP00000259008,9606.ENSP00000264663,9606.ENSP00000265131,9606.ENSP00000315644,9606.ENSP00000323889,9606.ENSP00000361359,9606.ENSP00000377224	COL1A1,BRIP1,NNT,TNC,TYMS,TRIM25,CD40,CDKN2D
GO:0034641	cellular nitrogen compound metabolic process	110	5126	0.14	0.0061	9606.ENSP00000219302,9606.ENSP00000228843,9606.ENSP00000234091,9606.ENSP00000236137,9606.ENSP00000243326,9606.ENSP00000243440,9606.ENSP00000246229,9606.ENSP00000247026,9606.ENSP00000259008,9606.ENSP00000263774,9606.ENSP00000264151,9606.ENSP00000264220,9606.ENSP00000264233,9606.ENSP00000264596,9606.ENSP00000264663,9606.ENSP00000265140,9606.ENSP00000265728,9606.ENSP00000265849,9606.ENSP00000272342,…	NME3,RAD51AP1,ID2,SLC19A2,RIF1,BATF3,PLAGL2,NSRP1,BRIP1,NDUFS3,OSGEPL1,PPAT,POLQ,NEIL3,NNT,ANKRD32,DBF4,PMS2,ETAA1,MMS22L,BARX2,CERS3,DCK,CHAC2,ATP5L,CD2BP2,RFX2,ESCO2,ATAD5,ZNF436,TYMS,UBE2N,SCD5,DEGS1,MYEF2,TRIM25,MRE11A,LARP1,SNCA,RBMX2,NPR2,FOXM1,LYAR,SUV39H2,AQPEP,ZBTB18,XRCC2,MT-ND4L,MT-ND4,CENPF,DTL,RC3H1,ZBTB37,SMPDL3A,CREB3L4,QRSL1,MBNL3,RAD54L,ASS1,AGO4,SCAI,TGIF2,MSH5,TCF19,KLF12,MCM8,…
GO:0045931	positive regulation of mitotic cell cycle	10	144	0.65	0.0069	9606.ENSP00000261597,9606.ENSP00000265140,9606.ENSP00000330382,9606.ENSP00000355958,9606.ENSP00000360793,9606.ENSP00000382507,9606.ENSP00000393139,9606.ENSP00000425561,9606.ENSP00000453403,9606.ENSP00000471191	NDC80,ANKRD32,PDGFB,DTL,KIF20B,UBXN2B,CDC7,EIF4E,NUSAP1,NUP62
GO:0000083	regulation of transcription involved in G1/S transition of mitotic cell cycle	5	29	1.04	0.0078	9606.ENSP00000229758,9606.ENSP00000234091,9606.ENSP00000315644,9606.ENSP00000368349,9606.ENSP00000396308	FBXO5,ID2,TYMS,POLA1,DHFR
GO:0034622	cellular protein-containing complex assembly	28	832	0.33	0.0079	9606.ENSP00000229758,9606.ENSP00000262225,9606.ENSP00000263774,9606.ENSP00000265148,9606.ENSP00000273853,9606.ENSP00000290130,9606.ENSP00000304903,9606.ENSP00000309790,9606.ENSP00000335463,9606.ENSP00000337289,9606.ENSP00000352271,9606.ENSP00000354961,9606.ENSP00000355922,9606.ENSP00000356669,9606.ENSP00000362306,9606.ENSP00000364737,9606.ENSP00000372088,9606.ENSP00000377007,9606.ENSP00000377601,…	FBXO5,TMED2,NDUFS3,CENPE,CENPC,MIS18A,CD2BP2,MIS18BP1,CASC5,CENPQ,XRCC2,MT-ND4,CENPF,RC3H1,AGO4,CENPP,RAD51,CENPN,HELLS,RPL24,VAMP1,CENPK,FKBP1A,PET117,DNAAF3,SCO2,BOP1,MIS12
GO:0033043	regulation of organelle organization	35	1155	0.29	0.0087	9606.ENSP00000229758,9606.ENSP00000241261,9606.ENSP00000243326,9606.ENSP00000257861,9606.ENSP00000261597,9606.ENSP00000263181,9606.ENSP00000264198,9606.ENSP00000264982,9606.ENSP00000265140,9606.ENSP00000265148,9606.ENSP00000274364,9606.ENSP00000285735,9606.ENSP00000295851,9606.ENSP00000302530,9606.ENSP00000316176,9606.ENSP00000319417,9606.ENSP00000325863,9606.ENSP00000328236,9606.ENSP00000330382,…	FBXO5,TNFSF10,RIF1,AVIL,NDC80,KIF18A,MUL1,CEP70,ANKRD32,CENPE,IQGAP2,RHOC,ABI2,BUB1,UBE2N,SKA3,MRE11A,KNTC1,PDGFB,SNCA,CENPF,NEK7,PYGO2,MKI67,TTK,KIF20B,GRTP1,YWHAQ,RASSF7,MGARP,UBXN2B,GPX1,STMN1,NUSAP1,NUP62
GO:0070925	organelle assembly	24	666	0.36	0.0087	9606.ENSP00000229758,9606.ENSP00000243706,9606.ENSP00000257861,9606.ENSP00000264982,9606.ENSP00000265148,9606.ENSP00000273853,9606.ENSP00000287482,9606.ENSP00000301765,9606.ENSP00000306335,9606.ENSP00000335463,9606.ENSP00000355922,9606.ENSP00000356355,9606.ENSP00000356669,9606.ENSP00000370337,9606.ENSP00000377007,9606.ENSP00000377640,9606.ENSP00000379911,9606.ENSP00000382507,9606.ENSP00000413017,…	FBXO5,HAUS3,AVIL,CEP70,CENPE,CENPC,SASS6,VPS37C,RFX2,CASC5,CENPF,NEK7,RC3H1,CEP152,CENPN,RPL24,CENPK,UBXN2B,CCDC28B,DNAAF3,CEP290,BOP1,NUP62,MIS12
GO:0006270	DNA replication initiation	5	31	1.01	0.0098	9606.ENSP00000368164,9606.ENSP00000368349,9606.ENSP00000393139,9606.ENSP00000418268,9606.ENSP00000429089	MCM8,POLA1,CDC7,MCM10,CCNE2
GO:0006301	postreplication repair	6	51	0.88	0.0107	9606.ENSP00000316176,9606.ENSP00000323889,9606.ENSP00000355958,9606.ENSP00000368699,9606.ENSP00000376272,9606.ENSP00000428209	UBE2N,TRIM25,DTL,ISG15,RFC4,UBE2V2
GO:0022607	cellular component assembly	58	2343	0.2	0.014	9606.ENSP00000225964,9606.ENSP00000229758,9606.ENSP00000243706,9606.ENSP00000246229,9606.ENSP00000257861,9606.ENSP00000259008,9606.ENSP00000261681,9606.ENSP00000262225,9606.ENSP00000263314,9606.ENSP00000263774,9606.ENSP00000264220,9606.ENSP00000264233,9606.ENSP00000264982,9606.ENSP00000265148,9606.ENSP00000273853,9606.ENSP00000274938,9606.ENSP00000285735,9606.ENSP00000287482,9606.ENSP00000290130,…	COL1A1,FBXO5,HAUS3,PLAGL2,AVIL,BRIP1,MPP5,TMED2,P2RX3,NDUFS3,PPAT,POLQ,CEP70,CENPE,CENPC,SCUBE3,RHOC,SASS6,MIS18A,SOAT2,VPS37C,RAC3,CD2BP2,RFX2,MIS18BP1,KNTC1,CASC5,CENPQ,XRCC2,MT-ND4,CENPF,NEK7,RC3H1,PYGO2,CD40,AGO4,CENPP,MSH5,CEP152,RAD51,CENPN,HELLS,RPL24,VAMP1,CENPK,UBXN2B,FKBP1A,PET117,BEND3,CCDC28B,FBLIM1,LPXN,DNAAF3,SCO2,CEP290,BOP1,NUP62,MIS12
GO:0044085	cellular component biogenesis	62	2556	0.19	0.0141	9606.ENSP00000225964,9606.ENSP00000229758,9606.ENSP00000243706,9606.ENSP00000246229,9606.ENSP00000257861,9606.ENSP00000259008,9606.ENSP00000261681,9606.ENSP00000262225,9606.ENSP00000263314,9606.ENSP00000263774,9606.ENSP00000264220,9606.ENSP00000264233,9606.ENSP00000264982,9606.ENSP00000265148,9606.ENSP00000273853,9606.ENSP00000274938,9606.ENSP00000285735,9606.ENSP00000287482,9606.ENSP00000290130,…	COL1A1,FBXO5,HAUS3,PLAGL2,AVIL,BRIP1,MPP5,TMED2,P2RX3,NDUFS3,PPAT,POLQ,CEP70,CENPE,CENPC,SCUBE3,RHOC,SASS6,MIS18A,SOAT2,VPS37C,RAC3,CD2BP2,RFX2,MIS18BP1,KNTC1,CASC5,CENPQ,LYAR,XRCC2,MT-ND4,CENPF,NEK7,RC3H1,PYGO2,SURF6,CD40,AGO4,CENPP,MSH5,CEP152,RAD51,CENPN,HELLS,RPL24,UTP14A,VAMP1,CENPK,UBXN2B,FKBP1A,PET117,EXOSC6,BEND3,CCDC28B,FBLIM1,LPXN,DNAAF3,SCO2,CEP290,BOP1,NUP62,MIS12
GO:0006139	nucleobase-containing compound metabolic process	97	4551	0.13	0.0217	9606.ENSP00000219302,9606.ENSP00000228843,9606.ENSP00000234091,9606.ENSP00000243326,9606.ENSP00000243440,9606.ENSP00000246229,9606.ENSP00000247026,9606.ENSP00000259008,9606.ENSP00000263774,9606.ENSP00000264151,9606.ENSP00000264220,9606.ENSP00000264233,9606.ENSP00000264596,9606.ENSP00000264663,9606.ENSP00000265140,9606.ENSP00000265728,9606.ENSP00000265849,9606.ENSP00000272342,9606.ENSP00000275053,…	NME3,RAD51AP1,ID2,RIF1,BATF3,PLAGL2,NSRP1,BRIP1,NDUFS3,OSGEPL1,PPAT,POLQ,NEIL3,NNT,ANKRD32,DBF4,PMS2,ETAA1,MMS22L,BARX2,DCK,ATP5L,CD2BP2,RFX2,ESCO2,ATAD5,ZNF436,TYMS,UBE2N,SCD5,MYEF2,TRIM25,MRE11A,SNCA,RBMX2,NPR2,FOXM1,LYAR,SUV39H2,ZBTB18,XRCC2,MT-ND4L,MT-ND4,CENPF,DTL,RC3H1,ZBTB37,SMPDL3A,CREB3L4,QRSL1,MBNL3,RAD54L,AGO4,SCAI,TGIF2,MSH5,TCF19,KLF12,MCM8,POLA1,ISG15,RAD51,RFC4,CDKN2D,HELLS,RPL24,U…
GO:0065003	protein-containing complex assembly	41	1514	0.24	0.0217	9606.ENSP00000225964,9606.ENSP00000229758,9606.ENSP00000246229,9606.ENSP00000262225,9606.ENSP00000263314,9606.ENSP00000263774,9606.ENSP00000264220,9606.ENSP00000264233,9606.ENSP00000265148,9606.ENSP00000273853,9606.ENSP00000274938,9606.ENSP00000290130,9606.ENSP00000301466,9606.ENSP00000304903,9606.ENSP00000309790,9606.ENSP00000328236,9606.ENSP00000335463,9606.ENSP00000337289,9606.ENSP00000352271,…	COL1A1,FBXO5,PLAGL2,TMED2,P2RX3,NDUFS3,PPAT,POLQ,CENPE,CENPC,SCUBE3,MIS18A,SOAT2,CD2BP2,MIS18BP1,KNTC1,CASC5,CENPQ,XRCC2,MT-ND4,CENPF,RC3H1,PYGO2,CD40,AGO4,CENPP,RAD51,CENPN,HELLS,RPL24,VAMP1,CENPK,FKBP1A,PET117,BEND3,LPXN,DNAAF3,SCO2,BOP1,NUP62,MIS12
GO:0043933	protein-containing complex subunit organization	46	1770	0.22	0.0226	9606.ENSP00000225964,9606.ENSP00000229758,9606.ENSP00000246229,9606.ENSP00000261597,9606.ENSP00000262225,9606.ENSP00000263181,9606.ENSP00000263314,9606.ENSP00000263774,9606.ENSP00000264220,9606.ENSP00000264233,9606.ENSP00000265148,9606.ENSP00000273853,9606.ENSP00000274938,9606.ENSP00000286398,9606.ENSP00000290130,9606.ENSP00000301466,9606.ENSP00000304903,9606.ENSP00000309790,9606.ENSP00000328236,…	COL1A1,FBXO5,PLAGL2,NDC80,TMED2,KIF18A,P2RX3,NDUFS3,PPAT,POLQ,CENPE,CENPC,SCUBE3,SMC2,MIS18A,SOAT2,CD2BP2,MIS18BP1,KNTC1,CASC5,CENPQ,XRCC2,MT-ND4,CENPF,RC3H1,PYGO2,CD40,AGO4,CENPP,RAD51,CENPN,HELLS,RPL24,VAMP1,CENPK,FKBP1A,PET117,STMN1,BEND3,LPXN,DNAAF3,SCO2,MRPL42,BOP1,NUP62,MIS12
GO:0006333	chromatin assembly or disassembly	10	174	0.57	0.0245	9606.ENSP00000273853,9606.ENSP00000290130,9606.ENSP00000309790,9606.ENSP00000335463,9606.ENSP00000337289,9606.ENSP00000346997,9606.ENSP00000364737,9606.ENSP00000377007,9606.ENSP00000377601,9606.ENSP00000379911	CENPC,MIS18A,MIS18BP1,CASC5,CENPQ,SUV39H2,CENPP,CENPN,HELLS,CENPK
GO:0000226	microtubule cytoskeleton organization	16	393	0.42	0.0267	9606.ENSP00000229758,9606.ENSP00000243706,9606.ENSP00000261597,9606.ENSP00000263181,9606.ENSP00000263753,9606.ENSP00000265148,9606.ENSP00000287482,9606.ENSP00000352271,9606.ENSP00000356355,9606.ENSP00000358813,9606.ENSP00000370337,9606.ENSP00000382507,9606.ENSP00000410452,9606.ENSP00000436975,9606.ENSP00000453403,9606.ENSP00000471191	FBXO5,HAUS3,NDC80,KIF18A,SGOL1,CENPE,SASS6,XRCC2,NEK7,TTK,CEP152,UBXN2B,STMN1,DNAAF3,NUSAP1,NUP62
GO:0033047	regulation of mitotic sister chromatid segregation	6	63	0.78	0.0276	9606.ENSP00000261597,9606.ENSP00000265140,9606.ENSP00000265148,9606.ENSP00000302530,9606.ENSP00000355922,9606.ENSP00000358813	NDC80,ANKRD32,CENPE,BUB1,CENPF,TTK
GO:0022616	DNA strand elongation	4	23	1.05	0.0295	9606.ENSP00000325863,9606.ENSP00000368349,9606.ENSP00000376272,9606.ENSP00000401018	MRE11A,POLA1,RFC4,GINS3
GO:0046483	heterocycle metabolic process	99	4716	0.13	0.0295	9606.ENSP00000219302,9606.ENSP00000228843,9606.ENSP00000234091,9606.ENSP00000236137,9606.ENSP00000243326,9606.ENSP00000243440,9606.ENSP00000246229,9606.ENSP00000247026,9606.ENSP00000259008,9606.ENSP00000263774,9606.ENSP00000264151,9606.ENSP00000264220,9606.ENSP00000264233,9606.ENSP00000264596,9606.ENSP00000264663,9606.ENSP00000265140,9606.ENSP00000265728,9606.ENSP00000265849,9606.ENSP00000272342,…	NME3,RAD51AP1,ID2,SLC19A2,RIF1,BATF3,PLAGL2,NSRP1,BRIP1,NDUFS3,OSGEPL1,PPAT,POLQ,NEIL3,NNT,ANKRD32,DBF4,PMS2,ETAA1,MMS22L,BARX2,DCK,ATP5L,CD2BP2,RFX2,ESCO2,ATAD5,ZNF436,TYMS,UBE2N,SCD5,MYEF2,TRIM25,MRE11A,SNCA,RBMX2,NPR2,FOXM1,LYAR,SUV39H2,ZBTB18,XRCC2,MT-ND4L,MT-ND4,CENPF,DTL,RC3H1,ZBTB37,SMPDL3A,CREB3L4,QRSL1,MBNL3,RAD54L,AGO4,SCAI,TGIF2,MSH5,TCF19,KLF12,MCM8,POLA1,ISG15,RAD51,RFC4,CDKN2D,HELLS…
GO:0010389	regulation of G2/M transition of mitotic cell cycle	9	149	0.59	0.0304	9606.ENSP00000243706,9606.ENSP00000264982,9606.ENSP00000325863,9606.ENSP00000328818,9606.ENSP00000355922,9606.ENSP00000355958,9606.ENSP00000370337,9606.ENSP00000393139,9606.ENSP00000448012	HAUS3,CEP70,MRE11A,GPR132,CENPF,DTL,CEP152,CDC7,CEP290
GO:0022414	reproductive process	37	1350	0.24	0.0304	9606.ENSP00000229758,9606.ENSP00000241261,9606.ENSP00000243786,9606.ENSP00000259008,9606.ENSP00000262225,9606.ENSP00000263181,9606.ENSP00000263753,9606.ENSP00000264220,9606.ENSP00000265131,9606.ENSP00000273853,9606.ENSP00000286398,9606.ENSP00000295746,9606.ENSP00000302530,9606.ENSP00000306335,9606.ENSP00000325863,9606.ENSP00000329797,9606.ENSP00000330382,9606.ENSP00000335463,9606.ENSP00000335628,…	FBXO5,TNFSF10,INHA,BRIP1,TMED2,KIF18A,SGOL1,PPAT,TNC,CENPC,SMC2,KIAA1524,BUB1,RFX2,MRE11A,CADM1,PDGFB,CASC5,SPDYA,HORMAD2,NPR2,XRCC2,PYGO2,CREB3L4,TTK,RAD54L,AGO4,GJB3,MSH5,MCM8,RAD51,ANKLE1,DIAPH3,CCNE2,MYBL1,ANKRD49,NUP62
GO:0051640	organelle localization	20	574	0.35	0.0357	9606.ENSP00000243706,9606.ENSP00000261597,9606.ENSP00000262225,9606.ENSP00000263181,9606.ENSP00000264198,9606.ENSP00000264982,9606.ENSP00000265148,9606.ENSP00000273853,9606.ENSP00000333547,9606.ENSP00000337289,9606.ENSP00000338345,9606.ENSP00000355922,9606.ENSP00000370337,9606.ENSP00000377971,9606.ENSP00000381928,9606.ENSP00000382507,9606.ENSP00000448012,9606.ENSP00000453403,9606.ENSP00000471191,…	HAUS3,NDC80,TMED2,KIF18A,MUL1,CEP70,CENPE,CENPC,RAB11B,CENPQ,SNCA,CENPF,CEP152,ANKLE1,MGARP,UBXN2B,CEP290,NUSAP1,NUP62,MIS12
GO:0006725	cellular aromatic compound metabolic process	99	4754	0.12	0.0359	9606.ENSP00000219302,9606.ENSP00000228843,9606.ENSP00000234091,9606.ENSP00000236137,9606.ENSP00000243326,9606.ENSP00000243440,9606.ENSP00000246229,9606.ENSP00000247026,9606.ENSP00000259008,9606.ENSP00000263774,9606.ENSP00000264151,9606.ENSP00000264220,9606.ENSP00000264233,9606.ENSP00000264596,9606.ENSP00000264663,9606.ENSP00000265140,9606.ENSP00000265728,9606.ENSP00000265849,9606.ENSP00000272342,…	NME3,RAD51AP1,ID2,SLC19A2,RIF1,BATF3,PLAGL2,NSRP1,BRIP1,NDUFS3,OSGEPL1,PPAT,POLQ,NEIL3,NNT,ANKRD32,DBF4,PMS2,ETAA1,MMS22L,BARX2,DCK,ATP5L,CD2BP2,RFX2,ESCO2,ATAD5,ZNF436,TYMS,UBE2N,SCD5,MYEF2,TRIM25,MRE11A,SNCA,RBMX2,NPR2,FOXM1,LYAR,SUV39H2,ZBTB18,XRCC2,MT-ND4L,MT-ND4,CENPF,DTL,RC3H1,ZBTB37,SMPDL3A,CREB3L4,QRSL1,MBNL3,RAD54L,AGO4,SCAI,TGIF2,MSH5,TCF19,KLF12,MCM8,POLA1,ISG15,RAD51,RFC4,CDKN2D,HELLS…
GO:0031497	chromatin assembly	9	154	0.57	0.036	9606.ENSP00000273853,9606.ENSP00000290130,9606.ENSP00000309790,9606.ENSP00000335463,9606.ENSP00000337289,9606.ENSP00000364737,9606.ENSP00000377007,9606.ENSP00000377601,9606.ENSP00000379911	CENPC,MIS18A,MIS18BP1,CASC5,CENPQ,CENPP,CENPN,HELLS,CENPK
GO:0007129	synapsis	5	46	0.84	0.0402	9606.ENSP00000259008,9606.ENSP00000325863,9606.ENSP00000362306,9606.ENSP00000364855,9606.ENSP00000429089	BRIP1,MRE11A,AGO4,MSH5,CCNE2
GO:0045830	positive regulation of isotype switching	4	26	0.99	0.0402	9606.ENSP00000243326,9606.ENSP00000313171,9606.ENSP00000361359,9606.ENSP00000398597	RIF1,ATAD5,CD40,EXOSC6
GO:0051983	regulation of chromosome segregation	7	97	0.66	0.0408	9606.ENSP00000261597,9606.ENSP00000265140,9606.ENSP00000265148,9606.ENSP00000302530,9606.ENSP00000355922,9606.ENSP00000357643,9606.ENSP00000358813	NDC80,ANKRD32,CENPE,BUB1,CENPF,MKI67,TTK
GO:0007131	reciprocal meiotic recombination	5	48	0.82	0.0462	9606.ENSP00000259008,9606.ENSP00000325863,9606.ENSP00000352271,9606.ENSP00000364855,9606.ENSP00000372088	BRIP1,MRE11A,XRCC2,MSH5,RAD51
GO:0030071	regulation of mitotic metaphase/anaphase transition	5	49	0.81	0.0479	9606.ENSP00000261597,9606.ENSP00000265148,9606.ENSP00000302530,9606.ENSP00000355922,9606.ENSP00000358813	NDC80,CENPE,BUB1,CENPF,TTK
GO:1903285	positive regulation of hydrogen peroxide catabolic process	2	2	1.81	0.0479	9606.ENSP00000264663,9606.ENSP00000338345	NNT,SNCA
GO:1903438	positive regulation of mitotic cytokinetic process	2	2	1.81	0.0479	9606.ENSP00000360793,9606.ENSP00000471191	KIF20B,NUP62
GO:0051656	establishment of organelle localization	15	387	0.39	0.0495	9606.ENSP00000261597,9606.ENSP00000262225,9606.ENSP00000263181,9606.ENSP00000265148,9606.ENSP00000273853,9606.ENSP00000333547,9606.ENSP00000337289,9606.ENSP00000338345,9606.ENSP00000355922,9606.ENSP00000377971,9606.ENSP00000381928,9606.ENSP00000382507,9606.ENSP00000453403,9606.ENSP00000471191,9606.ENSP00000484532	NDC80,TMED2,KIF18A,CENPE,CENPC,RAB11B,CENPQ,SNCA,CENPF,ANKLE1,MGARP,UBXN2B,NUSAP1,NUP62,MIS12
