# Supplementary material for: Chidamide Reverses Fluzoparib Resistance in Triple-Negative Breast Cancer Cells
Source: Front Oncol. 2022 Feb 18;12:819714. doi: 10.3389/fonc.2022.819714 (PMC8894594; doi:10.3389/fonc.2022.819714)
Supplement: Supplementary file 10 [file Table_8.xlsx]

## Sheet: Sheet1
		HCC1937				HCC1937-FR				MDA-MB-468				MDA-MB-468-FR
PARP		0.553438	0.537149	0.582695		0.588473	0.565284	0.611173		0.539261	0.493524	0.566384		0.663163	0.661867	0.696385
RAD51		0.746391	0.70147	0.799242		1.34092	1.43459	1.29265		0.727626	0.7767	0.68426		1.17527	1.12471	1.21658
MRE11		0.339214	0.356244	0.303168		0.709642	0.740197	0.674571		0.37837	0.388642	0.341865		0.766585	0.821019	0.716483
