# Supplementary material for: Chidamide Reverses Fluzoparib Resistance in Triple-Negative Breast Cancer Cells
Source: Front Oncol. 2022 Feb 18;12:819714. doi: 10.3389/fonc.2022.819714 (PMC8894594; doi:10.3389/fonc.2022.819714)
Supplement: Supplementary file 11 [file Table_9.xlsx]

## Sheet: Sheet1
	PBS				Fluzoparib 30μg/ml				Chidamide 3μg/ml				Fluzoparib 30μg/ml+Chidamide 3μg/ml
RAD51	2.19837	2.24373	2.29047		1.51125	1.61083	1.56417		1.42797	1.50577	1.53072		1.02987	1.16842	1.11201
MRE11	1.75648	1.70965	1.81106		1.35803	1.30183	1.41262		1.3117	1.26523	1.37586		0.86599	0.811232	0.933846
PARP	1.45374	1.58653	1.51782		1.29182	1.34803	1.25417		1.50169	1.45289	1.40976		1.28659	1.20099	1.24531
BCL-XL	1.09205	1.12513	1.05461		0.819313	0.87549	0.934134		0.643645	0.591311	0.701658		0.218499	0.209453	0.281464
P-CDK1	0.234099	0.206174	0.283746		0.369018	0.415585	0.464182		0.43573	0.490127	0.398682		0.572671	0.539895	0.643957
	PBS				Fluzoparib 30μg/ml				Chidamide 6μg/ml				Fluzoparib 30μg/ml+Chidamide 6μg/ml
RAD51	3.47346	3.34895	3.42923		2.61835	2.80161	2.73515		2.67846	2.74284	2.76135		1.7972	1.84494	1.72641
MRE11	2.73491	2.78646	2.6649		2.44131	2.53049	2.57665		2.09185	2.15195	2.19649		1.87142	1.74495	1.80655
PARP	2.25489	2.20699	2.12489		1.74125	1.68716	1.79224		2.04967	2.16781	2.10783		1.53917	1.5972	1.66513
BCL-XL	0.758461	0.808942	0.869443		0.777131	0.821388	0.876465		0.515435	0.588461	0.643156		0.246175	0.201466	0.316499
P-CDK1	1.62904	1.6845	1.53588		2.25644	2.13485	2.1702		2.38808	2.47465	2.31846		3.14879	3.00465	3.07447
