# Supplementary material for: Chidamide Reverses Fluzoparib Resistance in Triple-Negative Breast Cancer Cells
Source: Front Oncol. 2022 Feb 18;12:819714. doi: 10.3389/fonc.2022.819714 (PMC8894594; doi:10.3389/fonc.2022.819714)
Supplement: Supplementary file 12 [file Table_10.xlsx]

## Sheet: Sheet1
	HCC1937-FR	HCC1937
RAD51	43.2253	15.0748
MRE11	36.5556	6.88056
RFC4	7.63591	15.2923
RAD54L	3.36105	7.12219
POLA1	5.89024	13.6447
MCM10	2.73362	5.6288
