# Supplementary material for: Chidamide Reverses Fluzoparib Resistance in Triple-Negative Breast Cancer Cells
Source: Front Oncol. 2022 Feb 18;12:819714. doi: 10.3389/fonc.2022.819714 (PMC8894594; doi:10.3389/fonc.2022.819714)
Supplement: Supplementary file 13 [file Table_11.xlsx]

## Sheet: Sheet1
HCC1937-PBS	HCC1937-FR-PBS	Fluzoparib 30μg/ml	Chidamide 3μg/ml	Fluzoparib 30μg/ml+Chidamide 3μg/ml
265	615	352	429	181
237	583	330	403	163
209	551	308	377	145
MDA-MB-468-PBS	MDA-MB-468-FR-PBS	Fluzoparib 30μg/ml	Chidamide 6μg/ml	Fluzoparib 30μg/ml+Chidamide 6μg/ml
638	1287	863	731	317
619	1178	742	692	253
592	1032	687	612	284
