# Supplementary material for: Chidamide Reverses Fluzoparib Resistance in Triple-Negative Breast Cancer Cells
Source: Front Oncol. 2022 Feb 18;12:819714. doi: 10.3389/fonc.2022.819714 (PMC8894594; doi:10.3389/fonc.2022.819714)
Supplement: Supplementary file 14 [file Table_12.xlsx]

## Sheet: Sheet1
HCC1937-PBS	HCC1937-FR-PBS	Fluzoparib 30μg/ml	Chidamide 3μg/ml	Fluzoparib 30μg/ml+Chidamide 3μg/ml
50.4935	70.7445	50.0246	53.9866	39.7339
47.9835	67.6445	46.8846	51.9366	37.3939
45.4735	64.5445	43.7446	49.8866	35.0539
MDA-MB-468-PBS	MDA-MB-468-FR-PBS	Fluzoparib 30μg/ml	Chidamide 6μg/ml	Fluzoparib 30μg/ml+Chidamide 6μg/ml
29.38	51.15	35.55	42.93	32.87
27.3	48.17	38.7	40.59	30.32
25.22	45.19	35.55	38.25	27.77
