# Supplementary material for: Chidamide Reverses Fluzoparib Resistance in Triple-Negative Breast Cancer Cells
Source: Front Oncol. 2022 Feb 18;12:819714. doi: 10.3389/fonc.2022.819714 (PMC8894594; doi:10.3389/fonc.2022.819714)
Supplement: Supplementary file 15 [file Table_13.xlsx]

## Sheet: Sheet1
		HCC1937					HCC1937-FR
0.390625		81.0627	94.2987	87.0123	87.1325		85.9305	91.5597	90.6995	87.8768
0.78125		76.0627	82.2987	84.0123	71.1325		92.8342	87.3531	83.658	83.2432
1.5625		74.4415	65.9427	76.9606	79.0766		92.8342	84.3531	85.658	87.2432
3.125		58.9566	67.9578	60.9757	75.9917		90.1979	85.9368	74.9223	76.8299
6.25		43.2967	49.1197	48.1979	54.5055		87.3262	71.8947	77.114	78.3751
12.5		18.7758	25.3428	14.7687	19.2646		86.6685	71.3751	78.9637	82.1778
25		3.14642	1.83492	4.29096	3.5869		66.2353	58.983	72.1586	68.4144
50		1.87082	2.14658	4.11464	1.90944		60.5348	59.5577	55.7824	64.6161
100		1.6746	2.27651	2.07047	1.35144		13.7005	8.2327	10.8705	15.3653
200		1.74005	1.93544	2.00411	1.29343		5.5508	7.48245	7.87565	10.699
		MDA-MB-468					MDA-MB-468-FR
0.390625		87.5923	96.2699	95.5904	94.1556		94.2484	92.3649	94.9701	91.7531
0.78125		87.8755	102.307	92.0044	87.5726		94.183	91.8968	90.479	93.4568
1.5625		89.5923	91.0035	90.471	74.216		78.4334	94.4846	92.4315	96.2662
3.125		68.6695	78.8927	86.8565	98.4901		82.5849	94.474	91.0249	96.0471
6.25		62.6652	71.4314	77.1084	65.2613		95.5098	81.3926	75.6407	91.8518
12.5		52.279	55.9377	42.5838	62.8676		98.5033	75.7527	92.2814	88.9506
25		29.4549	41.4417	34.7788	38.7944		88.3137	89.8343	69.988	72.0247
50		36.0515	18.3391	35.1588	32.9849		96.9673	63.1453	65.7485	81.3827
100		13.8412	11.2249	10.5915	18.0929		44.4052	32.623	30.6527	32.9012
200		5.98712	10.0692	4.89595	12.77		12.902	11.6531	12.2096	19.0617
